# Supplementary material
Source: PubMed Central journal article supplement (PMC8277683)

## Online Repository

### Trends in emergency department visits and hospitalizations for anaphylaxis among US older adults: 2006-2014

Anna Chen Arroyo, MD, MPH; Lacey B. Robinson, MD; Rebecca E. Cash PhD, MPH; Mohammad Kamal Faridi, MPH; Kohei Hasegawa MD, Carlos A. Camargo Jr., MD, DrPH

**Address manuscript correspondence to:** Anna Chen Arroyo, MD, MPH, 300 Pasteur Drive MC 5236, Stanford, CA 94305, Phone: 650-723-3200 Fax: 650-503-0169 Email: [annaarroyo@stanford.edu](mailto:annaarroyo@stanford.edu)

### Table of Contents

- Table E1. ICD-9-CM diagnostic codes used for acute allergic reactions
- Table E2. ICD-9-CM diagnostic codes and algorithm used for anaphylaxis
- Table E3. Characteristics of anaphylaxis-related ED visits among younger adults (18-64 years) and older adults ( $\geq 65$  years) in the US, 2006-2014 National Emergency Department Sample
- Table E4. Clinical risk factors for severe anaphylaxis (hospitalization, cardiac arrest/intubation, or death) among US older adults – Method I only, 2006-2014 National Emergency Department Sample
- Table E5. Clinical risk factors for severe anaphylaxis (cardiac arrest/intubation or death) among US older adults – Method I only, 2006-2014 National Inpatient Sample
- Figure E1. Flow diagram for anaphylaxis ED visits and hospitalizations
- Figure E2. Rate of emergency department visits for acute allergic reactions per 100,000 population among all adults ( $\geq 18$  years) in the US, 2006-2014 National Emergency Department Sample
- Figure E3. Rate of emergency department visits for acute allergic reactions per 100,000 population among older adults ( $\geq 65$  years) in the US, 2006-2014 National Emergency Department Sample
- Figure E4. Rate of hospitalizations per 100,000 population for acute allergic reactions among all adults ( $\geq 18$  years) in the US, 2006-2014 National Inpatient Sample
- Figure E5. Rate of hospitalizations per 100,000 population for acute allergic reactions among older adults ( $\geq 65$  years) in the US, 2006-2014 National Inpatient Sample

**Table E1. ICD-9-CM diagnostic codes used for acute allergic reactions**

| Acute Allergic Reactions | ICD-9-CM Code |                                                                         |
|--------------------------|---------------|-------------------------------------------------------------------------|
| Drug Allergy             | 693.0         | Dermatitis due to drug                                                  |
|                          | 995.2         | Unspecified adverse effect due to unspecified drug                      |
|                          | 995.1         | Angioneurotic edema                                                     |
|                          | 995.4         | Shock due to Anesthesia                                                 |
| Venom Allergy            | 989.5         | Toxic effect of venom                                                   |
| Food Allergy             | 693.1         | Dermatitis due to food                                                  |
|                          | 995.60        | Anaphylactic shock due to unspecified food                              |
|                          | 995.61        | Anaphylactic shock due to peanuts                                       |
|                          | 995.62        | Anaphylactic shock due to crustaceans                                   |
|                          | 995.63        | Anaphylactic shock due to fruits & vegetables                           |
|                          | 995.64        | Anaphylactic shock due to tree nuts & seeds                             |
|                          | 995.65        | Anaphylactic shock due to fish                                          |
|                          | 995.66        | Anaphylactic shock due to food additives                                |
|                          | 995.67        | Anaphylactic shock due to milk products                                 |
|                          | 995.68        | Anaphylactic shock due to eggs                                          |
|                          | 995.69        | Anaphylactic shock due to other specified food                          |
|                          | 995.70        | Adverse food reaction, not classified elsewhere                         |
|                          | Other Allergy | 995.0                                                                   |
| 995.3                    |               | Allergy, unspecified                                                    |
| 708.0                    |               | Allergic urticaria                                                      |
| 999.4                    |               | Anaphylactic reaction to serum                                          |
| 999.41                   |               | Anaphylactic reaction due to administration of blood and blood products |
| 999.42                   |               | Anaphylactic reaction due to vaccination                                |
| 999.49                   |               | Anaphylactic reaction due to other serum                                |

**Table E2. ICD-9-CM diagnostic codes and algorithm used for anaphylaxis**

|                                           |        |                                                                                                                                                                                                                                                                                                                                                                                                                                                                                                                                                                                                |
|-------------------------------------------|--------|------------------------------------------------------------------------------------------------------------------------------------------------------------------------------------------------------------------------------------------------------------------------------------------------------------------------------------------------------------------------------------------------------------------------------------------------------------------------------------------------------------------------------------------------------------------------------------------------|
| <b>Anaphylaxis Method I</b>               | 995.60 | Anaphylactic shock due to unspecified food                                                                                                                                                                                                                                                                                                                                                                                                                                                                                                                                                     |
|                                           | 995.61 | Anaphylactic shock due to peanuts                                                                                                                                                                                                                                                                                                                                                                                                                                                                                                                                                              |
|                                           | 995.62 | Anaphylactic shock due to crustaceans                                                                                                                                                                                                                                                                                                                                                                                                                                                                                                                                                          |
|                                           | 995.63 | Anaphylactic shock due to fruits & vegetables                                                                                                                                                                                                                                                                                                                                                                                                                                                                                                                                                  |
|                                           | 995.64 | Anaphylactic shock due to tree nuts & seeds                                                                                                                                                                                                                                                                                                                                                                                                                                                                                                                                                    |
|                                           | 995.65 | Anaphylactic shock due to fish                                                                                                                                                                                                                                                                                                                                                                                                                                                                                                                                                                 |
|                                           | 995.66 | Anaphylactic shock due to food additives                                                                                                                                                                                                                                                                                                                                                                                                                                                                                                                                                       |
|                                           | 995.67 | Anaphylactic shock due to milk products                                                                                                                                                                                                                                                                                                                                                                                                                                                                                                                                                        |
|                                           | 995.68 | Anaphylactic shock due to eggs                                                                                                                                                                                                                                                                                                                                                                                                                                                                                                                                                                 |
|                                           | 995.69 | Anaphylactic shock due to other specified food                                                                                                                                                                                                                                                                                                                                                                                                                                                                                                                                                 |
|                                           | 995.0  | Other anaphylactic shock                                                                                                                                                                                                                                                                                                                                                                                                                                                                                                                                                                       |
| <b>Anaphylaxis Method II<sup>14</sup></b> |        |                                                                                                                                                                                                                                                                                                                                                                                                                                                                                                                                                                                                |
| Symptoms                                  |        |                                                                                                                                                                                                                                                                                                                                                                                                                                                                                                                                                                                                |
| Skin-mucosal tissue involvement           |        | Conjunctival edema (372.73), Edema of eyelid (374.82), Edema of larynx (478.6), Edema of pharynx or nasopharynx (478.25), Flushing (782.62), Urticaria (708), Allergic urticaria (708.0), Idiopathic urticaria (708.1), Urticaria due to cold and heat (708.2), Dermatographic urticaria (708.3), Vibratory urticaria (708.4), Cholinergic urticaria (708.5), Other specified urticaria (708.8), Urticaria, unspecified (708.9), Pruritus and related conditions (698), Pruritus of genital organs (698.1), Other specified pruritic conditions (698.8), Unspecified pruritic disorder (698.9) |
| Respiratory compromise                    |        | Acute respiratory failure (518.81), acute respiratory distress (518.82), dyspnea/respiratory distress (786, 786.00–786.09), stridor (786.1), extrinsic asthma (493.0) or unspecified asthma (493.9)                                                                                                                                                                                                                                                                                                                                                                                            |
| Reduced blood pressure                    |        | Hypotension (458, 458.0, 458.2, 458.8, 458.9), or syncope/collapse (780.2)                                                                                                                                                                                                                                                                                                                                                                                                                                                                                                                     |
| Gastrointestinal symptoms                 |        | Allergic gastroenteritis/colitis (558.3), nausea/vomiting (787.0), nausea with vomiting (787.01), vomiting alone (787.03), or abdominal pain (789.0).                                                                                                                                                                                                                                                                                                                                                                                                                                          |
| Algorithm                                 |        | Skin-mucosal tissue involvement was found in conjunction with shock caused by anesthesia (995.4)                                                                                                                                                                                                                                                                                                                                                                                                                                                                                               |
|                                           |        | Respiratory compromise was found in conjunction with shock caused by anesthesia (995.4) or angioneurotic edema (995.1)                                                                                                                                                                                                                                                                                                                                                                                                                                                                         |
|                                           |        | Reduced blood pressure was found in conjunction with skin-mucosal involvement, angioneurotic edema (995.1), the toxic effect of venom (989.5), or an Ecode indicating the cause of poisoning was a venomous animal/plant (E905, E905.3, E905.5, E905.8, E905.9)                                                                                                                                                                                                                                                                                                                                |

|  |                                                                                                                                                                                                                                                                                                                                                                                                                                      |
|--|--------------------------------------------------------------------------------------------------------------------------------------------------------------------------------------------------------------------------------------------------------------------------------------------------------------------------------------------------------------------------------------------------------------------------------------|
|  | Reduced blood pressure and gastrointestinal symptoms were found in conjunction with an unspecified adverse effect caused by the correct administration of a drug, medicinal, and biologic substance (995.2) or an unspecified allergic reaction (995.3)                                                                                                                                                                              |
|  | Reduced blood pressure and skin-mucosal tissue involvement were found in conjunction with an unspecified adverse effect caused by the correct administration of a drug, medicinal, and biologic substance (995.2) or an unspecified allergic reaction (995.3)                                                                                                                                                                        |
|  | Respiratory compromise and reduced blood pressure were found in conjunction with an unspecified adverse effect caused by the correct administration of a drug, medicinal, and biologic substance (995.2) or an unspecified allergic reaction (995.3)                                                                                                                                                                                 |
|  | Respiratory compromise and gastrointestinal symptoms were found in conjunction with an unspecified adverse effect caused by the correct administration of a drug, medicinal, and biologic substance (995.2); an unspecified allergic reaction (995.3); skin-mucosal involvement; the toxic effect of venom (989.5); or an Ecode indicating the cause of poisoning was a venomous animal/plant (E905, E905.3, E905.5, E905.8, E905.9) |
|  | Respiratory compromise and skin-mucosal tissue involvement were found in conjunction with an unspecified adverse effect caused by the correct administration of a drug, medicinal, and biologic substance (995.2); an unspecified allergic reaction (995.3); the toxic effect of venom (989.5); or an Ecode indicating the cause of poisoning was a venomous animal/plant (E905, E905.3, E905.5, E905.8, E905.9)                     |
|  | Gastrointestinal symptoms and skin-mucosal tissue involvement were found in conjunction with an unspecified adverse effect caused by the correct administration of a drug, medicinal, and biologic substance (995.2); an unspecified allergic reaction (995.3); the toxic effect of venom (989.5); or an Ecode indicating the cause of poisoning was a venomous animal/plant (E905, E905.3, E905.5, E905.8, E905.9)                  |

**Table E3. Characteristics of anaphylaxis-related ED visits among younger adults (18-64 years) and older adults (≥65 years) in the US, 2006-2014 National Emergency Department Sample**

| Characteristics         | Adults (18-64 years) |                    |     |        | Older Adults (≥65 years) |                    |     |         |
|-------------------------|----------------------|--------------------|-----|--------|--------------------------|--------------------|-----|---------|
|                         | Unweighted Frequency | Weighted Frequency |     |        | Unweighted Frequency     | Weighted Frequency |     |         |
|                         |                      | Frequency          | %   | 95% CI |                          | Frequency          | %   | 95% CI  |
| Overall number          | 81,169               | 365,509            | 100 |        | 20,989                   | 93,795             | 100 |         |
| Sex                     |                      |                    |     |        |                          |                    |     |         |
| Male                    | 32,676               | 147,311            | 40  | 40-41  | 8,200                    | 36,801             | 39  | 39-40   |
| Female                  | 48,479               | 218,130            | 60  | 59-60  | 12,786                   | 56,973             | 61  | 60-61   |
| Missing                 | 14                   |                    |     |        | <10                      |                    |     |         |
| Epinephrine Use         | 5,354                | 24,100             | 7   | 6-7    | 418                      | 1,933              | 2   | 1.8-2.3 |
| Number of ED procedures |                      |                    |     |        |                          |                    |     |         |
| 0                       | 74,311               | 333,408            | 91  | 90-92  | 19,757                   | 88,143             | 94  | 93-95   |
| 1                       | 2,668                | 12,224             | 2   | 3-4    | 493                      | 2,203              | 2   | 2-3     |
| 2 or more               | 4,190                | 19,878             | 5   | 4-6    | 739                      | 3,415              | 4   | 3-4     |
| Any chronic condition   | 43,933               | 196,606            | 54  | 53-55  | 18,194                   | 81,230             | 87  | 86-87   |
| Type of Trigger         |                      |                    |     |        |                          |                    |     |         |
| Drug                    | 14,968               | 67,158             | 18  | 18-19  | 7,428                    | 33,013             | 35  | 34-36   |
| Venom                   | 5,647                | 25,142             | 7   | 6-7    | 1,267                    | 5,711              | 6   | 5.7-6.5 |
| Food                    | 14,900               | 68,103             | 19  | 18-19  | 1,304                    | 5,920              | 6   | 6.0-6.7 |
| Other/multiple          | 45,654               | 205,107            | 56  | 56-57  | 10,990                   | 49,152             | 52  | 52-53   |

Abbreviations: US, United States; CI, confidence interval; ED, emergency department.

**Table E4. Clinical risk factors for severe anaphylaxis (hospitalization, cardiac arrest/intubation, or death) among US older adults – Method I only, 2006-2014 National Emergency Department Sample**

| Risk Factors                     | Hospitalization |           | Cardiac arrest/Intubation |           | Death                 |           |
|----------------------------------|-----------------|-----------|---------------------------|-----------|-----------------------|-----------|
|                                  | OR              | 95% CI    | OR                        | 95% CI    | OR                    | 95% CI    |
| Year                             | 0.92            | 0.89-0.94 | 0.99                      | 0.96-1.02 | 1.03                  | 0.97-1.09 |
| Age                              |                 |           |                           |           |                       |           |
| 65-74 years                      | 1.00 (referent) |           | 1.00 (referent)           |           | 1.00 (referent)       |           |
| 75-84 years                      | 1.43            | 1.27-1.62 | 1.34                      | 1.16-1.55 | 1.29                  | 0.96-1.75 |
| ≥85 years                        | 2.12            | 1.72-2.62 | 1.46                      | 1.18-1.80 | 2.81                  | 1.97-4.01 |
| Sex                              |                 |           |                           |           |                       |           |
| Male                             | 1.00 (referent) |           | 1.00 (referent)           |           | 1.00 (referent)       |           |
| Female                           | 0.83            | 0.75-0.93 | 0.83                      | 0.72-0.96 | 0.98                  | 0.74-1.31 |
| Primary Health Insurance         |                 |           |                           |           |                       |           |
| Private                          | 1.00 (referent) |           | 1.00 (referent)           |           | 1.00 (referent)       |           |
| Public                           | 1.37            | 1.15-1.62 | 1.27                      | 0.99-1.63 | 1.22                  | 0.65-2.27 |
| Self-pay                         | 1.39            | 0.74-2.64 | 1.32                      | 0.58-3.03 | <i>Not calculated</i> |           |
| Other                            | 1.13            | 0.61-2.10 | 1.10                      | 0.41-2.94 | 1.77                  | 0.36-8.61 |
| Median household income quartile |                 |           |                           |           |                       |           |
| 1 (lowest)                       | 1.38            | 1.14-1.66 | 1.59                      | 1.28-1.98 | 1.18                  | 0.77-1.80 |
| 2                                | 1.18            | 0.99-1.40 | 1.40                      | 1.14-1.72 | 1.38                  | 0.94-2.02 |
| 3                                | 1.16            | 0.98-1.37 | 1.24                      | 1.00-1.52 | 1.17                  | 0.78-1.75 |
| 4 (highest)                      | 1.00 (referent) |           | 1.00 (referent)           |           | 1.00 (referent)       |           |
| Season of Discharge              |                 |           |                           |           |                       |           |
| First quarter (Jan - Mar)        | 1.00 (referent) |           | 1.00 (referent)           |           | 1.00 (referent)       |           |
| Second quarter (Apr - Jun)       | 1.00            | 0.86-1.17 | 0.83                      | 0.68-1.01 | 0.77                  | 0.52-1.15 |
| Third quarter (Jul - Sep)        | 0.93            | 0.80-1.07 | 0.80                      | 0.67-0.96 | 0.86                  | 0.59-1.27 |
| Fourth quarter (Oct - Dec)       | 1.06            | 0.90-1.25 | 0.99                      | 0.82-1.19 | 0.96                  | 0.66-1.41 |
| Hospital Region                  |                 |           |                           |           |                       |           |
| Northeast                        | 1.00 (referent) |           | 1.00 (referent)           |           | 1.00 (referent)       |           |
| Midwest                          | 0.61            | 0.49-0.77 | 0.77                      | 0.61-0.97 | 0.55                  | 0.35-0.87 |
| South                            | 0.52            | 0.41-0.64 | 0.85                      | 0.69-1.05 | 0.56                  | 0.38-0.84 |
| West                             | 0.64            | 0.51-0.81 | 1.06                      | 0.84-1.35 | 0.67                  | 0.42-1.08 |
| Hospital Status                  |                 |           |                           |           |                       |           |
| Non-Metropolitan                 | 1.00 (referent) |           | 1.00 (referent)           |           | 1.00 (referent)       |           |
| Metropolitan, Non-teaching       | 1.77            | 1.48-2.12 | 1.68                      | 1.30-2.18 | 1.79                  | 0.98-3.28 |
| Metropolitan Teaching            | 1.98            | 1.65-2.37 | 2.15                      | 1.68-2.75 | 2.42                  | 1.34-4.40 |
| Weekend presentation             |                 |           |                           |           |                       |           |

|                       |                 |             |                 |             |                       |            |
|-----------------------|-----------------|-------------|-----------------|-------------|-----------------------|------------|
| No                    | 1.00 (referent) |             | 1.00 (referent) |             | 1.00 (referent)       |            |
| Yes                   | 0.94            | 0.83-1.07   | 0.96            | 0.80-1.14   | 1.02                  | 0.72-1.43  |
| Type of Trigger       |                 |             |                 |             |                       |            |
| Food                  | 1.00 (referent) |             | 1.00 (referent) |             | 1.00 (referent)       |            |
| Drug                  | 3.75            | 3.10-4.54   | 2.39            | 1.80-3.18   | 5.60                  | 2.47-12.70 |
| Venom                 | 0.52            | 0.29-0.94   | 1.60            | 0.70-3.65   | <i>Not calculated</i> |            |
| Other                 | 1.95            | 1.68-2.28   | 2.09            | 1.62-2.69   | 5.23                  | 2.37-11.54 |
| Epinephrine use in ED |                 |             |                 |             |                       |            |
| Yes                   | 1.00 (referent) |             | 1.00 (referent) |             | 1.00 (referent)       |            |
| No                    | 11.59           | 7.12-18.88  | 5.21            | 2.08-13.10  | 2.07                  | 0.50-8.68  |
| Any chronic condition |                 |             |                 |             |                       |            |
| No                    | 1.00 (referent) |             | 1.00 (referent) |             | 1.00 (referent)       |            |
| Yes                   | 15.77           | 12.70-19.58 | 19.96           | 10.69-37.26 | 17.96                 | 4.13-78.13 |

Note: Number of chronic conditions had to be collapsed due to unstable estimates for the 2 or more group  
 Survey weights were used to construct this model. Unweighted n = 8,273 (due to missing data); weighted n = 37,092.

**Table E5. Clinical risk factors for severe anaphylaxis (cardiac arrest/intubation or death) among US older adults – Method I only, 2006-2014 National Inpatient Sample**

| Risk Factors                     | Cardiac arrest/Intubation |           | Death           |            |
|----------------------------------|---------------------------|-----------|-----------------|------------|
|                                  | OR                        | 95% CI    | OR              | 95% CI     |
| Year                             | 1.00                      | 0.97-1.02 | 0.98            | 0.93-1.04  |
| Age                              |                           |           |                 |            |
| 65-74 years                      | 1.00 (referent)           |           | 1.00 (referent) |            |
| 75-84 years                      | 1.12                      | 0.96-1.30 | 1.30            | 0.95-1.77  |
| ≥85 years                        | 0.89                      | 0.70-1.12 | 2.13            | 1.47-3.09  |
| Sex                              |                           |           |                 |            |
| Male                             | 1.00 (referent)           |           | 1.00 (referent) |            |
| Female                           | 0.90                      | 0.79-1.03 | 0.93            | 0.71-1.22  |
| Race/Ethnicity                   |                           |           |                 |            |
| White                            | 1.00 (referent)           |           | 1.00 (referent) |            |
| Black                            | 1.50                      | 1.17-1.92 | 1.21            | 0.76-1.95  |
| Hispanic                         | 1.11                      | 0.84-1.45 | 0.86            | 0.49-1.52  |
| Asian                            | 1.03                      | 0.70-1.51 | 0.96            | 0.45-2.06  |
| Other                            | 1.24                      | 0.84-1.82 | 2.01            | 1.09-3.71  |
| Primary Health Insurance         |                           |           |                 |            |
| Private                          | 1.00 (referent)           |           | 1.00 (referent) |            |
| Public                           | 0.86                      | 0.68-1.07 | 1.40            | 0.80-2.45  |
| Self-pay                         | 0.78                      | 0.32-1.89 | 1.78            | 0.29-10.92 |
| Other                            | 1.30                      | 0.61-2.79 | 3.11            | 0.97-9.97  |
| Median household income quartile |                           |           |                 |            |
| 1 (lowest)                       | 1.13                      | 0.92-1.39 | 1.07            | 0.71-1.61  |
| 2                                | 1.04                      | 0.85-1.26 | 1.05            | 0.71-1.55  |
| 3                                | 0.98                      | 0.81-1.18 | 1.02            | 0.70-1.51  |
| 4 (highest)                      | 1.00 (referent)           |           | 1.00 (referent) |            |
| Season of Discharge              |                           |           |                 |            |
| First quarter (Jan - Mar)        | 1.00 (referent)           |           | 1.00 (referent) |            |
| Second quarter (Apr - Jun)       | 1.10                      | 0.91-1.33 | 1.16            | 0.79-1.71  |
| Third quarter (Jul - Sep)        | 0.97                      | 0.80-1.16 | 0.89            | 0.60-1.31  |
| Fourth quarter (Oct - Dec)       | 1.00                      | 0.83-1.21 | 1.10            | 0.75-1.61  |
| Hospital Region                  |                           |           |                 |            |
| Northeast                        | 1.00 (referent)           |           | 1.00 (referent) |            |



|                                                  |                 |           |                       |           |
|--------------------------------------------------|-----------------|-----------|-----------------------|-----------|
| Midwest                                          | 1.03            | 0.84-1.28 | 0.76                  | 0.49-1.19 |
| South                                            | 0.98            | 0.82-1.18 | 0.93                  | 0.64-1.36 |
| West                                             | 1.14            | 0.93-1.40 | 1.08                  | 0.72-1.63 |
| Hospital Status                                  |                 |           |                       |           |
| Non-Metropolitan                                 | 1.00 (referent) |           | 1.00 (referent)       |           |
| Metropolitan, Non-teaching                       | 1.10            | 0.87-1.41 | 1.03                  | 0.59-1.80 |
| Metropolitan Teaching                            | 1.40            | 1.10-1.78 | 1.05                  | 0.61-1.82 |
| Weekend presentation                             |                 |           |                       |           |
| No                                               | 1.00 (referent) |           | 1.00 (referent)       |           |
| Yes                                              | 0.99            | 0.83-1.17 | 1.17                  | 0.83-1.65 |
| Type of Trigger                                  |                 |           |                       |           |
| Food                                             | 1.00 (referent) |           | 1.00 (referent)       |           |
| Drug                                             | 0.90            | 0.69-1.19 | 1.56                  | 0.69-3.50 |
| Venom                                            | 1.51            | 0.35-6.45 | <i>Not calculated</i> |           |
| Other                                            | 1.15            | 0.90-1.47 | 2.88                  | 1.38-6.05 |
| Elixhauser Index Score                           | 1.06            | 1.05-1.07 | 1.08                  | 1.06-1.10 |
| Any chronic condition                            |                 |           |                       |           |
| No                                               | 1.00 (referent) |           | 1.00 (referent)       |           |
| Yes                                              | 1.17            | 1.03-1.32 | 1.11                  | 0.85-1.45 |
| Comorbidities* (referent: no for each condition) |                 |           |                       |           |
| Alcohol                                          | 2.64            | 1.65-4.22 | 1.81                  | 0.78-4.24 |
| Congestive Heart Failure                         | 0.81            | 0.66-0.99 | 0.73                  | 0.50-1.06 |
| Chronic Pulmonary Disease                        | 1.21            | 1.05-1.40 | 0.91                  | 0.68-1.22 |
| Diabetes                                         | 1.11            | 0.95-1.29 | 1.15                  | 0.84-1.56 |
| Hypertension                                     | 1.03            | 0.88-1.19 | 0.84                  | 0.63-1.11 |
| Liver Disease                                    | 0.45            | 0.24-0.86 | 0.79                  | 0.28-2.21 |
| Obesity                                          | 1.58            | 1.26-1.97 | 1.57                  | 1.01-2.46 |
| Oncologic                                        | 0.62            | 0.49-0.78 | 0.64                  | 0.42-0.98 |
| Renal Failure                                    | 0.76            | 0.63-0.93 | 0.92                  | 0.64-1.32 |
| Rheumatoid arthritis/collagen vascular diseases  | 0.94            | 0.67-1.32 | 1.36                  | 0.74-2.50 |

**Figure E1. Flow diagram for acute allergic reactions and anaphylaxis-related ED visits and hospitalizations in the U.S. from 2006-2014, National Emergency Department Sample (NEDS) and National Inpatient Sample (NIS)**

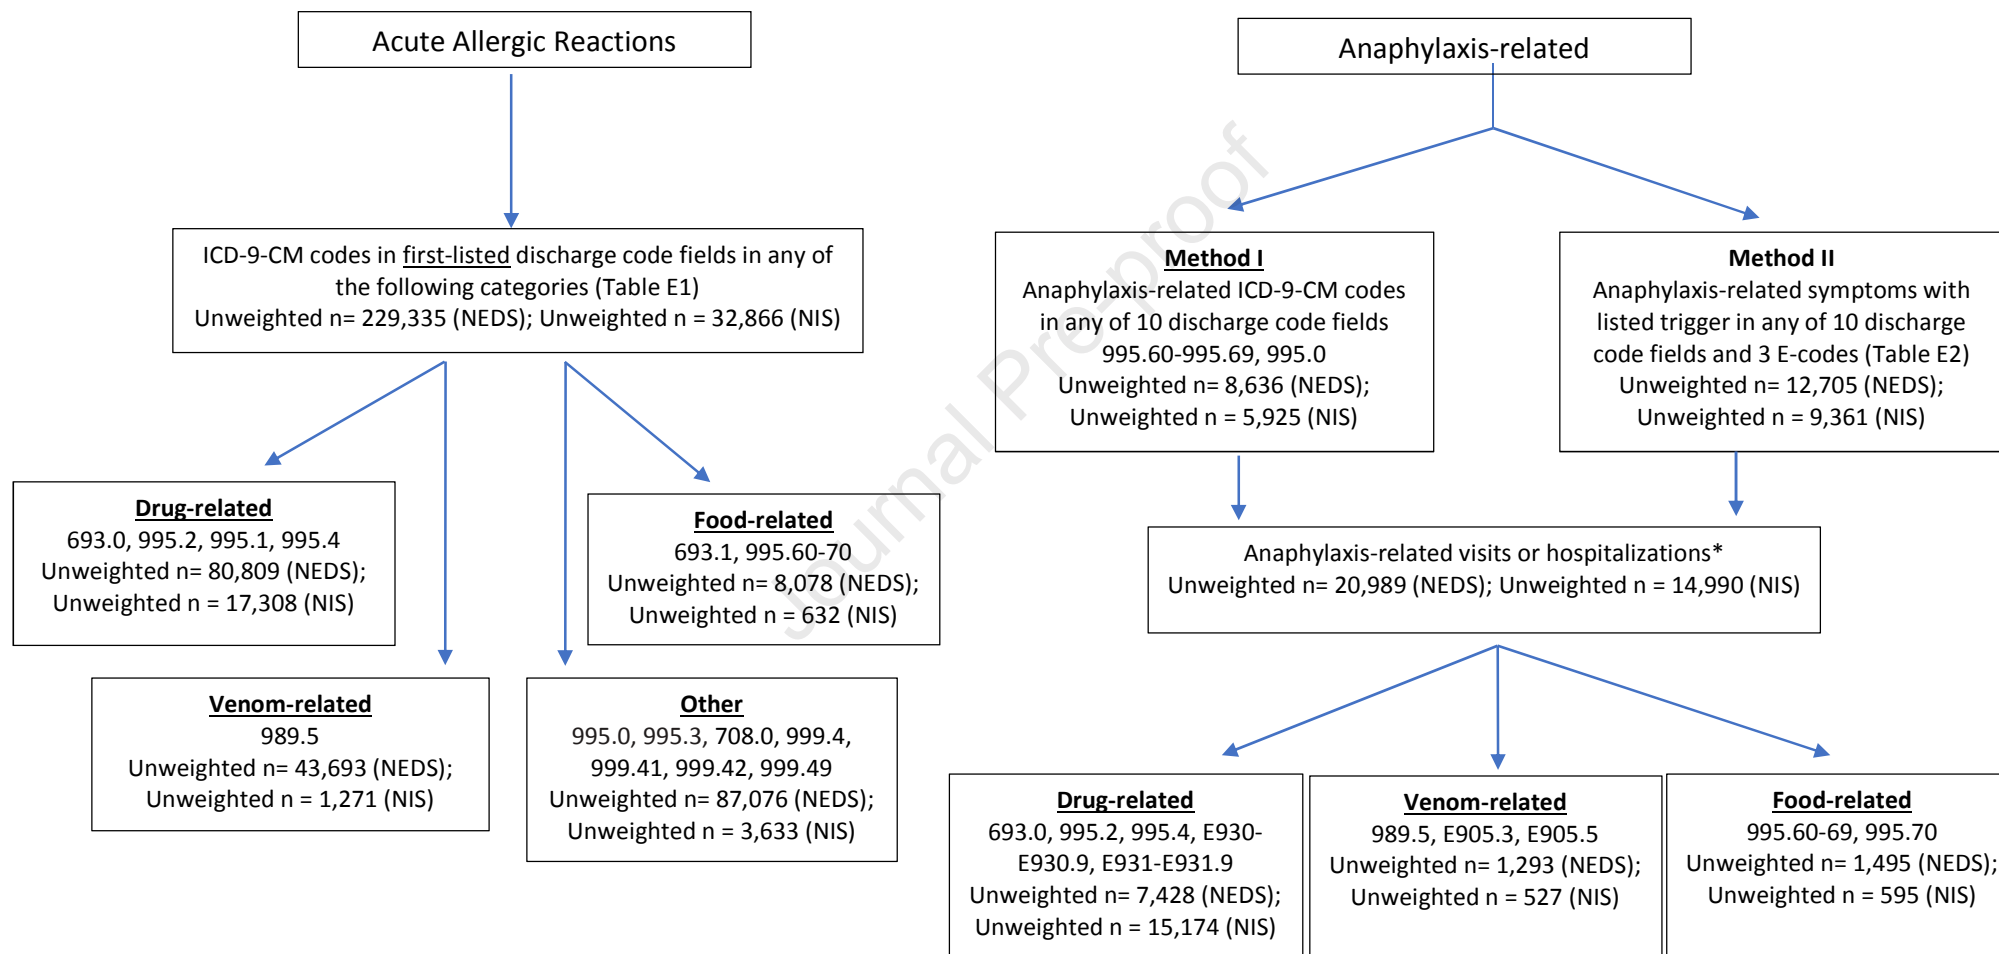

\*We also included an “other” category for anaphylaxis-related visits which included visits with multiple triggers or those visits that were not included in the above categories.

**Figure E2. Rate of emergency department visits for acute allergic reactions per 100,000 population among all adults ( $\geq 18$  years) in the US, 2006-2014 National Emergency Department Sample**

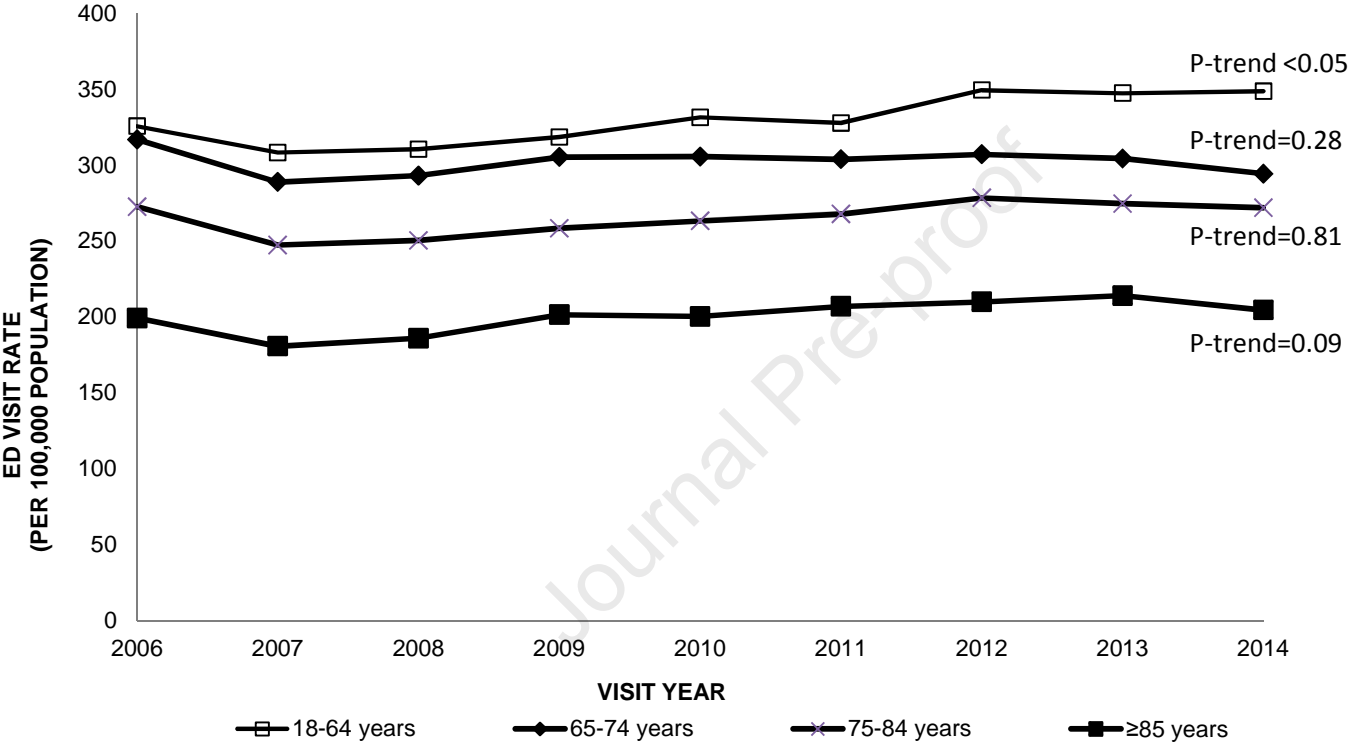

**Figure E3. Rate of emergency department visits for acute allergic reactions per 100,000 population among older adults ( $\geq 65$  years) in the US, 2006-2014 National Emergency Department Sample**

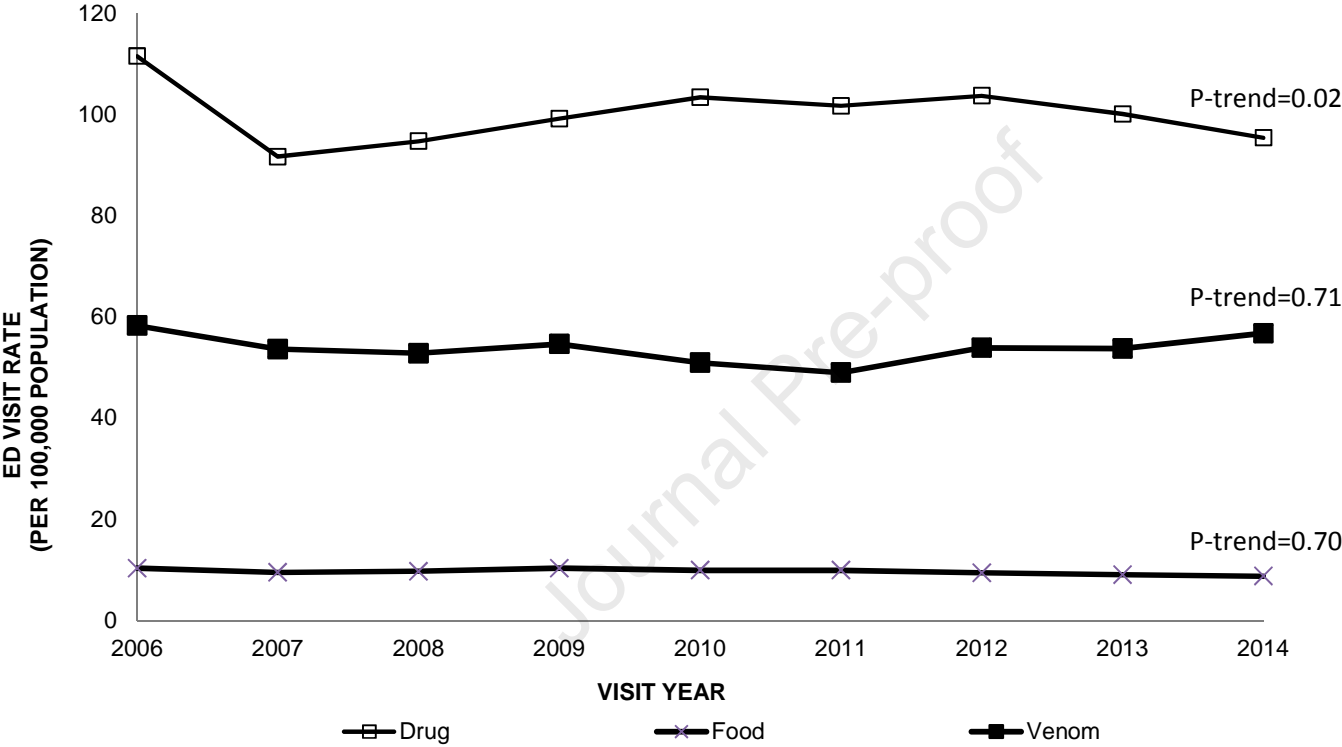

**Figure E4. Rate of hospitalizations per 100,000 population for acute allergic reactions among all adults ( $\geq 18$  years) in the US, 2006-2014 National Inpatient Sample**

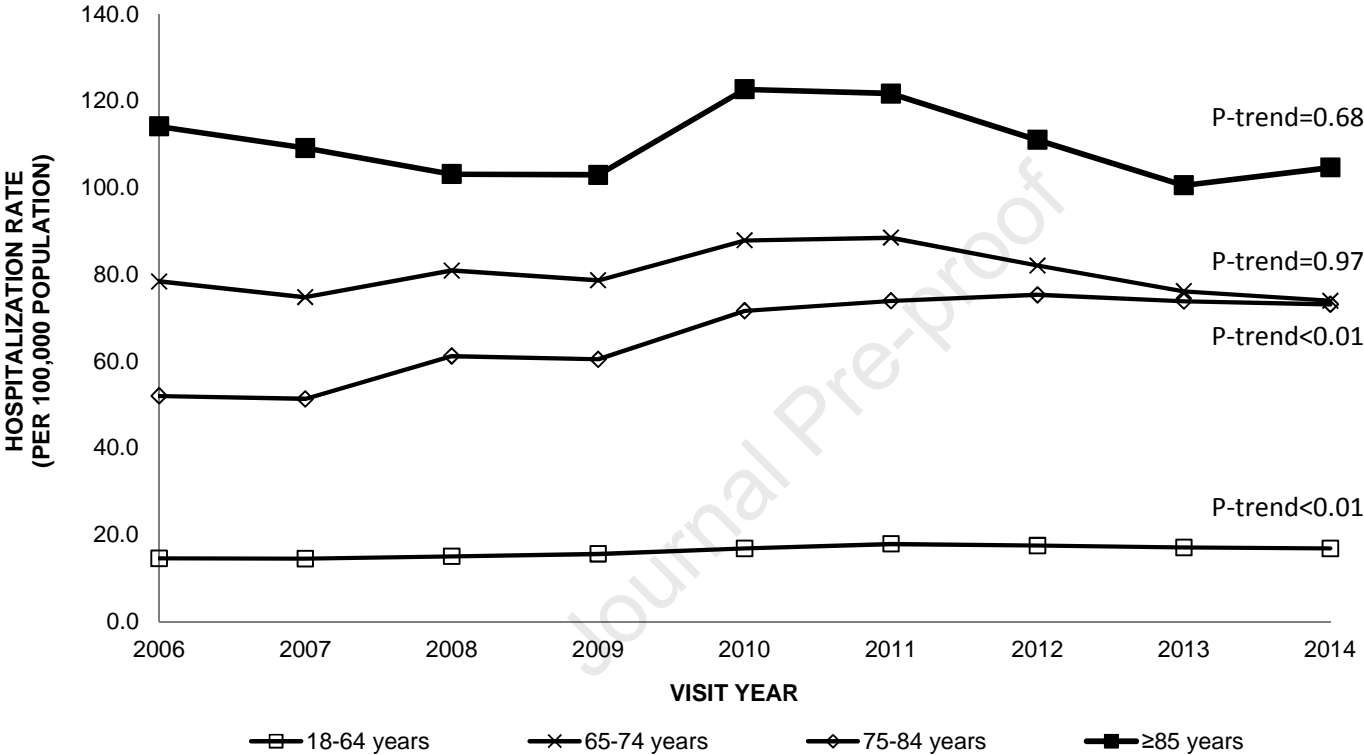

**Figure E5. Rate of hospitalizations per 100,000 population for acute allergic reactions among older adults ( $\geq 65$  years) in the US, 2006-2014 National Inpatient Sample**

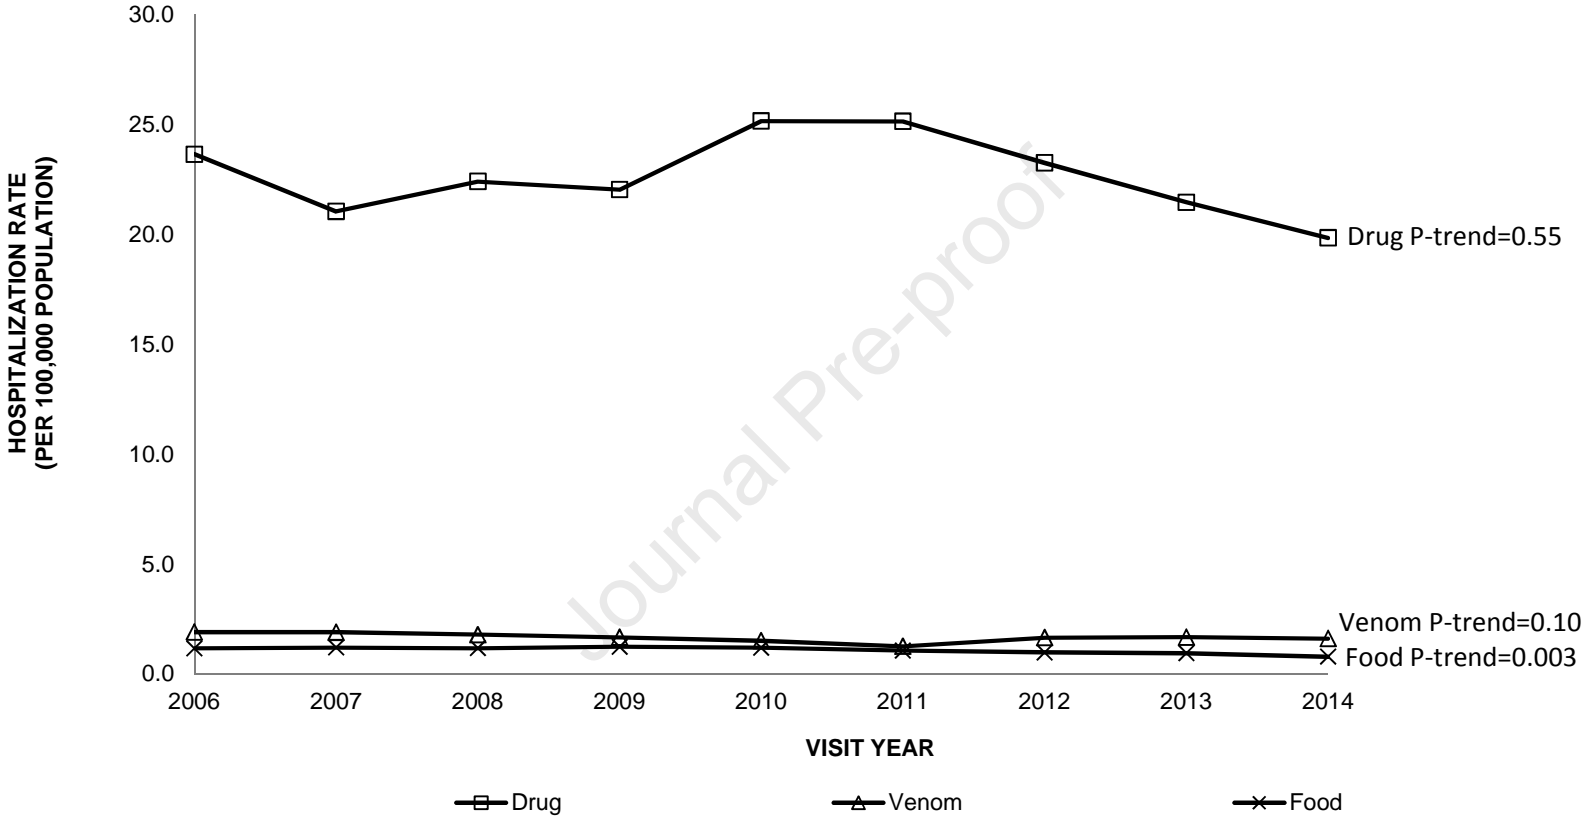

Supplement: NIHMS1688927-supplement-1.pdf [file NIHMS1688927-supplement-1.pdf]
